# Supplementary material for: Orbitally induced hierarchy of exchange interactions in the zigzag antiferromagnetic state of honeycomb silver delafossite Ag3Co2SbO6
Source: Royal Society of Chemistry journal article supplement (doi:10.1039/c6dt00516k), 2016-01-01
Supplement: c6dt00516k1.pdf [file c6dt00516k1.pdf]

**Electronic Supplementary Information for the paper**

**Orbitally induced hierarchy of exchange interactions in zigzag antiferromagnetic state of honeycomb silver delafossite  $\text{Ag}_3\text{Co}_2\text{SbO}_6$**

E.A. Zvereva<sup>1,\*</sup>, M.I. Stratan<sup>1</sup>, A.V. Ushakov<sup>2</sup>, V.B. Nalbandyan<sup>4</sup>, I.L. Shukaev<sup>4</sup>, A.V. Silhanek<sup>5</sup>, M. Abdel-Hafiez,<sup>5,6,7</sup> S.V. Streltsov<sup>2,3</sup>, and A.N. Vasiliev<sup>1,3,8</sup>

<sup>1</sup>Faculty of Physics, Moscow State University, 119991 Moscow, Russia

\*zvereva@mig.phys.msu.ru

<sup>2</sup>Institute of Metal Physics, S. Kovalevskoy St. 18, 620990 Ekaterinburg, Russia

<sup>3</sup>Ural Federal University, 620002 Ekaterinburg, Russia

<sup>4</sup>Chemistry Faculty, Southern Federal University, 344090 Rostov-on-Don, Russia

<sup>5</sup>Département de Physique, Université de Liège, B-4000 Sart Tilman, Belgium

<sup>6</sup>Institute of Physics, Goethe University Frankfurt, 60438 Frankfurt/M, Germany

<sup>7</sup>Faculty of Science, Physics Department, Fayoum University, 63514 Fayoum, Egypt.

<sup>8</sup>National University of Science and Technology "MISIS", 119049 Moscow, Russia

**Contents**

|                                                                                                                                       |   |
|---------------------------------------------------------------------------------------------------------------------------------------|---|
| Table S1. Known $\text{Ag}_3\text{M}_2\text{RO}_6$ and $\text{Ag}_3\text{MRXO}_6$ delafossite-related mixed oxides                    | 2 |
| Table S2. Experimental and refinement details for $\text{Ag}_3\text{M}_2\text{SbO}_6$ (M = Co, Zn)                                    | 3 |
| Table S3. Atomic coordinates, site occupancies and thermal displacement parameters for $\text{Ag}_3\text{M}_2\text{SbO}_6$ (M=Co, Zn) | 4 |
| Table S4. Important interatomic distances and bond angles in $\text{Ag}_3\text{M}_2\text{SbO}_6$ (M = Co, Zn)                         | 5 |
| Fig. S3. The magnetization curves for $\text{Ag}_3\text{Co}_2\text{SbO}_6$ at various temperatures.                                   | 6 |
| References                                                                                                                            |   |

Table S1. Known  $\text{Ag}_3\text{M}_2\text{RO}_6$  and  $\text{Ag}_3\text{MRXO}_6$  delafossite-related mixed oxides

Only  $\text{Ag}_2\text{SnO}_3$  [42, 43] has been prepared by direct synthesis and characterized by single-crystal diffraction. All other compounds have been prepared by ion exchange from the sodium or lithium counterparts; they exhibit very similar powder diffraction patterns typical of the rhombohedral  $\text{AgFeO}_2$  type; almost all show one or two weak and diffuse superstructure reflection; however, interpretations of these patterns are different.

| Composition                                                                               | Comments                                                                                                                                                                                                                                                                                        |
|-------------------------------------------------------------------------------------------|-------------------------------------------------------------------------------------------------------------------------------------------------------------------------------------------------------------------------------------------------------------------------------------------------|
| $\text{Ag}_3(\text{AgSn}_2)\text{O}_6$ [42, 43]                                           | The basic structure is double-layered $\text{P6}_322$ honeycomb type, but there is an incommensurate modulation with $a = 29.22 \text{ \AA}$ .                                                                                                                                                  |
| $\text{Ag}_3\text{LiTi}_2\text{O}_6$ [44]                                                 | Powder pattern indexed as a trigonal superstructure. No structure refinement.                                                                                                                                                                                                                   |
| $\text{Ag}_3\text{M}_2\text{SbO}_6$<br>(M = Ni, Zn) [31]                                  | No superlattice reflections found. The structures were refined within disordered $\text{Ag}(\text{M}_{2/3}\text{Sb}_{1/3})\text{O}_2$ $\text{R}\bar{3}m$ model, although the authors assumed high degree of local order.                                                                        |
| $\text{Ag}_3\text{LiM}_2\text{O}_6$<br>(M = Ti, Sn) [45]                                  | No indexing; disordered $\text{Ag}(\text{Li}_{1/3}\text{M}_{2/3})\text{O}_2$ formulas were used although one or two superlattice reflections were visible.                                                                                                                                      |
| $\text{Ag}_3\text{Co}_2\text{SbO}_6$ [46]                                                 | The superstructure was refined within the trigonal $\text{P3}_112$ model. However, accuracy was low, and monoclinic symmetry could not be excluded as discussed in the present paper.                                                                                                           |
| $\text{Ag}_3\text{LiRu}_2\text{O}_6$ [47]                                                 | Paradoxically, superstructure was refined omitting the unique superstructure reflection; monoclinic $\text{C2}/m$ model was used although no splitting of reflections from the rhombohedral subcell was detected. It was assumed that each layer was ordered but their stacking was disordered. |
| $\text{Ag}_3\text{LiRu}_2\text{O}_6$ [48]                                                 | No superlattice reflections found. The structure was refined within disordered $\text{Ag}(\text{Li}_{1/3}\text{Ru}_{2/3})\text{O}_2$ $\text{R}\bar{3}m$ model. Lattice parameters differ significantly (by 2.0-2.4%) from the subcell parameters in the preceding work [42].                    |
| $\text{Ag}_3\text{LiM}_2\text{O}_6$<br>(M = Rh, Ir) [49]                                  | Superlattice reflections were found in both X-ray and electron diffraction. Each layer is assumed to be fully ordered. However, the structures were refined within disordered $\text{Ag}(\text{Li}_{1/3}\text{M}_{2/3})\text{O}_2$ $\text{R}\bar{3}m$ model.                                    |
| $\text{Ag}_3\text{Ni}_2\text{BiO}_6$ [50]                                                 | Indexed as a trigonal superstructure ( $\text{P3}_112$ ). No structure refinement.                                                                                                                                                                                                              |
| $\text{Ag}_3\text{NaFeSbO}_6$ [51]                                                        | Indexed as a trigonal superstructure ( $\text{P3}_112$ ). Structural model was depicted but not refined.                                                                                                                                                                                        |
| $\text{Ag}_3\text{LiMTeO}_6$ (M = Co, Ni, Zn) [52],<br>$\text{Ag}_3\text{LiMnSbO}_6$ [53] | Superlattice reflections are visible but not discussed. No indexing, no lattice parameters.                                                                                                                                                                                                     |
| $\text{Ag}_3\text{LiMSbO}_6$ (M = Al, Cr, Fe, Ga) [53]                                    | Indexed as a trigonal superstructure ( $\text{P3}_112$ ). No structure refinement.                                                                                                                                                                                                              |

Table S2. Experimental and refinement details for  $\text{Ag}_3\text{M}_2\text{SbO}_6$  (M = Co, Zn)

| Formula                       | $\text{Ag}_3\text{Co}_2\text{SbO}_6$                                  | $\text{Ag}_3\text{Zn}_2\text{SbO}_6$ |
|-------------------------------|-----------------------------------------------------------------------|--------------------------------------|
| Formula weight                | 659.2                                                                 | 672.1                                |
| Crystal system                | monoclinic                                                            | monoclinic                           |
| Space group                   | C2/m                                                                  | C2/m                                 |
| Z                             | 2                                                                     | 2                                    |
| a, Å                          | 5.3770(13)                                                            | 5.3829(2)                            |
| b, Å                          | 9.3118(22)                                                            | 9.3102(3)                            |
| c, Å                          | 6.4810(14)                                                            | 6.5046(2)                            |
| $\beta$ , °                   | 106.512(7)                                                            | 106.306(4)                           |
| V, Å <sup>3</sup>             | 311.12(2)                                                             | 312.87(2)                            |
| Sample preparation            | Amorphous admixture (beryllium carbonate or coffee) to reduce texture |                                      |
| Diffractometer                | Rigaku D/max-RC                                                       | ARL X'tra                            |
| Diffraction geometry          | Bragg-Brentano                                                        |                                      |
| Wavelength selection          | Secondary-beam monochromator                                          | Solid-state Si(Li) detector          |
| Wavelength (CuK $\alpha$ ), Å | 1.5406, 1.5444                                                        |                                      |
| U, kV                         | 55                                                                    | 40                                   |
| I, mA                         | 180                                                                   | 40                                   |
| Receiving slit, mm            | 0.3                                                                   | 0.4                                  |
| Angular range, °              | 10–100                                                                | 12–101.4                             |
| Step size, °                  | 0.02                                                                  | 0.02                                 |
| Count time, s                 | 3                                                                     | 2.4                                  |
| Number of data points         | 4500                                                                  | 4470                                 |
| Number of hkl                 | 179                                                                   | 179                                  |
| Number of variables           | 55                                                                    | 57                                   |
| $R_{\text{wp}}$               | 0.0769                                                                | 0.0605                               |
| $R_{\text{exp}}$              | 0.0276                                                                | 0.0423                               |
| $R_{\text{F}}^2$              | 0.0198                                                                | 0.0228                               |
| $\chi^2$                      | 7.830                                                                 | 2.067                                |

Table S3. Atomic coordinates, site occupancies and thermal displacement parameters for  $\text{Ag}_3\text{M}_2\text{SbO}_6$  (M = Co, Zn)

| Atom | $\text{Ag}_3\text{Co}_2\text{SbO}_6$ |            |          |           |          | $\text{Ag}_3\text{Zn}_2\text{SbO}_6$ |           |            |            |           |
|------|--------------------------------------|------------|----------|-----------|----------|--------------------------------------|-----------|------------|------------|-----------|
|      | x                                    | y          | z        | sof       | Uiso     | x                                    | y         | z          | sof        | Uiso      |
| Sb1  | 0                                    | 0          | 0        | 0.458(23) | 0.016(4) | 0                                    | 0         | 0          | 0.358(7)   | 0.0203(9) |
| M1   | 0                                    | 0          | 0        | 0.542(23) | 0.016(4) | 0                                    | 0         | 0          | 0.642(7)   | 0.0203(9) |
| M2   | 0                                    | 0.6661(10) | 0        | 0.729(11) | 0.022(4) | 0                                    | 0.6688(4) | 0          | 0.679(3)   | 0.0251(5) |
| Sb2  | 0                                    | 0.6661(10) | 0        | 0.271(11) | 0.022(4) | 0                                    | 0.6688(4) | 0          | 0.321(3)   | 0.0251(5) |
| Ag1  | 0                                    | 1/2        | 1/2      | 0.962(12) | 0.016(3) | 0                                    | 1/2       | 1/2        | 0.977(3)   | 0.0131(5) |
| Ag2  | 1/2                                  | 0.3426(6)  | 1/2      | 0.927(7)  | 0.006(3) | 1/2                                  | 0.3413(3) | 1/2        | 0.9423(16) | 0.0183(3) |
| O1   | 0.618(5)                             | 0.364(2)   | 0.827(4) | 1         | 0.01     | 0.598(3)                             | 0.3695(6) | 0.8258(10) | 1          | 0.01      |
| O2   | 0.833(7)                             | 1/2        | 0.173(8) | 1         | 0.01     | 0.846(3)                             | 1/2       | 0.1736(18) | 1          | 0.01      |

Comments. The authors assume that the reported M/Sb mixing is fictitious due to multiple stacking faults whereas each individual layer is essentially ordered with site 1 occupied by Sb only and site 2, by  $\text{M}^{2+}$  only. Displacement parameters for O1 and O2 were fixed to prevent instability and negative values during the structure refinement process.

Table S4. Important interatomic distances (Å) and bond angles (°) in  $\text{Ag}_3\text{M}_2\text{SbO}_6$  (M = Co, Zn)

|           | $\text{Ag}_3\text{Co}_2\text{SbO}_6$ | $\text{Ag}_3\text{Zn}_2\text{SbO}_6$ |
|-----------|--------------------------------------|--------------------------------------|
| M1-O2     | 1.82(3)×2                            | 1.888(13)×2                          |
| -O1       | 1.92(3)×4                            | 1.837(9)×4                           |
| average   | 1.88                                 | 1.85                                 |
| M2-O1     | 2.06(2)×2                            | 2.171(12)×2                          |
| -O2       | 2.24(4)×2                            | 2.227(11)×2                          |
| -O1       | 2.34(2)×2                            | 2.322(8)×2                           |
| Average   | 2.21                                 | 2.24                                 |
| Ag1-O2    | 2.05(5)×2                            | 2.051(11)×2                          |
| Ag2-O1    | 2.04(2)×2                            | 2.052(6)×2                           |
| O2-Ag1-O2 | 180.0                                | 180.0                                |
| O1-Ag2-O1 | 168.8(10)                            | 165.3(2)                             |
| M1-O1-M2  | 102.5 (11)                           | 101.7(4)                             |
| M1-O1-M2  | 93.5(7)                              | 95.0(2)                              |
| M2-O1-M2  | 89.8(9)                              | 86.7(3)                              |
| M1-O2-M2  | 98.94(2)×2                           | 98.159(2)×2                          |
| M2-O2-M2  | 87.22(1)                             | 89.791(1)                            |

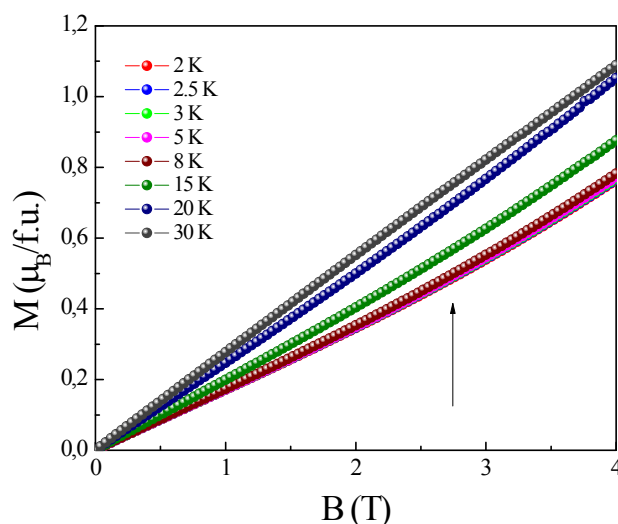

Fig. S1. The magnetization curves for  $\text{Ag}_3\text{Co}_2\text{SbO}_6$  at various temperatures.

#### References

- [31] R. Nagarajan, S. Uma, M.K. Jayaraj, J. Tate, A.W. Sleight. *Solid State Sci.* **4**, 787 (2002).
- [42] C. Linke, M. Jansen. *Z. anorg. allgem. Chem.* **623**, 1441 (1997).
- [43] T. Oku, A. Carlsson, J.-O. Bovin, C. Svensson, L.R. Wallenberg, C. Linke, M. Jansen. *Acta Cryst. B* **56**, 363 (2000).
- [44] V.B. Nalbandyan. *Russ. J. Inorg. Chem.* **45**, 1652 (2000).
- [45] Y. Hosogi, H. Kato, A. Kudo. *J. Mater. Chem.* **18**, 647 (2008).
- [46] V.V. Politaev, V.B. Nalbandyan, A.A. Petrenko, I.L. Shukaev, V.A. Volotchaev, B.S. Medvedev. *J. Solid State Chem.* **183**, 684 (2010).
- [47] S.A.J. Kimber, C.D. Ling, D.J.P. Morris, A. Chemseddine, P.F. Henry and D.N. Argyriou, *J. Mater. Chem.* **20**, 8021 (2010).
- [48] K. Ramesha, A.S. Prakash, M. Sathiya, G. Madras, A.K. Shukla. *Mater. Sci. Eng. B* **176**, 141 (2011).
- [49] V. Todorova, A. Leineweber, L. Kienle, V. Duppel, M. Jansen. *J. Solid State Chem.* **184**, 1112 (2011).
- [50] R. Berthelot, W. Schmidt, S. Muir, J. Eilertsen, L. Etienne, A.W. Sleight, M.A. Subramanian, *Inorg. Chem.* **51**, 5377 (2012).
- [51] V.V. Politaev, V.B. Nalbandyan. *Solid State Sci.* **11**, 144 (2009).
- [52] V. Kumar, N. Bhardwaj, N. Tomar, V. Thakral, S. Uma, *Inorg. Chem.* **51**, 10471 (2012).
- [53] N. Bhardwaj, A. Gupta, S. Uma. *Dalton Trans.* **43**, 12050 (2014).
